# 1 Free-ranging dogs understand human intentions and adjust their 2 behavioral responses accordingly

3

4 Debottam Bhattacharjee<sup>1</sup>, Shubhra Sau<sup>1</sup>, and Anindita Bhadra<sup>1\*</sup>

## 5 Affiliations:

6 <sup>1</sup> Department of Biological Sciences, Indian Institute of Science Education and Research  
7 Kolkata, Nadia, West Bengal, India

## 8 \*Correspondence

9 Dr Anindita Bhadra

10 E-mail: [abhadra@iiserkol.ac.in](mailto:abhadra@iiserkol.ac.in) (AB)

11

## 12 ABSTRACT

13 Domestic dogs (*Canis lupus familiaris*) are remarkably sensitive and responsive while  
14 interacting with humans. Pet dogs are known to have social skills and abilities to display  
15 situation-specific responses, but there is lack of information regarding free-ranging dogs  
16 which constitute majority of the world's dog population. Free-ranging dogs found in most of  
17 the developing countries interact constantly with familiar and unfamiliar humans receiving  
18 both positive and negative behavior. Thus, understanding human intentions and subsequent  
19 behavioral adjustments are crucial for dogs that share habitats with humans. Here we  
20 subjected free-ranging dogs to different human social communicative cues (friendly and  
21 threatening – low and high), followed by a food provisioning phase and tested their  
22 responsiveness. Dogs exhibited higher proximity seeking behavior as a reaction to friendly  
23 gesture whereas, they were prompted to maintain distance depending on the impact of the  
24 threatening cues. Interestingly, only the high-impact threatening showed to have a persistent  
25 effect which also remained during the subsequent food provisioning phase. An elevated  
26 approach in the food provisioning phase elicited the dependency of free-ranging dogs on  
27 humans for sustenance. Our findings suggest that free-ranging dogs demonstrate behavioral  
28 plasticity on interacting with humans; which provides significant insights into the  
29 establishment of the dog-human relationship on streets.

30

31 **Keywords:** Free-ranging dogs, Human intentions, Communication, Behavioral plasticity,  
32 Dog-human relationship.

33

## 34 INTRODUCTION

35 Recent trends in research on interspecific interactions have unveiled several important  
36 aspects regarding the interplay of the component species. Investigating the eco-ethology of  
37 one component species and its trajectories can provide adequate information on the other  
38 (Bertness and Callaway, 1994; Thompson, 1999). Human-animal interaction is one such field  
39 that attracts researchers to find solutions for evolving problems like human-animal conflict,  
40 spread of zoonoses, uncontrolled population growth of unwanted species, etc. In the recent  
41 times, studies on human-animal interactions have enabled us to apprehend evolutionary  
42 processes like domestication (Hare et al., 2002; Miklósi and Soproni, 2006). Such scientific

43 investigations, coupled with comparative analyses, also helped us understand the  
44 functionality of behaviors and communicative intents of species. As the first domesticated  
45 species, dogs have spent a considerably long period of time socially interacting with humans  
46 (Larson et al., 2012; Morey, 2006; Perri, 2016). Thus, exploring the dog-human interaction  
47 paradigm, is specifically helpful to analyse the underlying dynamics of the domestication  
48 process that enabled the transition of wolf-like ancestors to man's best friend.

49 Domesticated dogs interact with humans regularly and possess social abilities to respond to  
50 various human actions (Hare and Tomasello, 2005; Miklósi and Soproni, 2006). Dogs are  
51 highly sensitive to human communicative cues like pointing, touching, body orientation etc.  
52 and in utilising such cues to find hidden rewards such as food (Hare et al., 2002; Miklósi and  
53 Soproni, 2006). It has been suggested that domestication played a pivotal role in the  
54 development of human-like social skills in dogs (Hare and Tomasello, 2005). At the same  
55 time, substantial evidence for the importance of life history and ontogenic experience with  
56 humans in the development of the dog-human relationship is also present (Dorey et al., 2010;  
57 Wynne et al., 2008). Dogs have been shown to flexibly adjust their behavior in several  
58 interactive instances with humans such as, avoiding pointing cues provided by "unreliable  
59 humans" (Takaoka et al., 2015), following pointing cues only on being rewarded in a  
60 preceding trial, thereby showing the ability to adjust behavioral responses (Bhattacharjee et  
61 al., 2017a) etc. One study also confirmed dogs' understanding of human attentional states,  
62 suggesting the fact that dogs can specifically ask for help when a human is paying attention to  
63 it (Miklósi et al., 2000). Dogs have been shown to give emphasis on human body and face  
64 while decoding intentions (Nagasawa et al., 2011). Vas et al. (2005) found that pet dogs can  
65 differentiate between friendly and threatening cues provided by an unfamiliar human and can  
66 display situation-relevant behavior. The same study also reported breed specific differences  
67 of dogs' responsiveness due to varying levels of sensitivity towards humans. Except for one  
68 study mentioned above, all the other studies explored behavioral plasticity in pet dogs and  
69 hence is not representative of dogs that are not under the direct supervision, and thereby  
70 influence, of humans.

71 Free-ranging dogs that are primarily present in the developing countries make up almost 80%  
72 of the world's dog population (Boitani and Ciucci, 1995; Hughes and Macdonald, 2013).  
73 However, studies are significantly lacking and insufficient with these dogs. They are partially  
74 dependent on humans for their sustenance, but their activities are not directly controlled by  
75 humans (Bhadra et al., 2016; Sen Majumder et al., 2014; Paul et al., 2016). Unlike pet dogs,  
76 the free-ranging subpopulation receive both positive and negative human influences; humans  
77 play the most significant role in mortality of these dogs (Paul et al., 2016), while also being  
78 the primary provider of food. This particular difference, along with other ecological  
79 parameters pertaining to survival (competition for food, inter-group dynamics etc.) make  
80 free-ranging dogs different from pets. The interaction between free-ranging dogs and humans  
81 on the streets are quite complex and dynamic. They usually avoid human contact but can  
82 form strong bonds over repeated positive interactions with unfamiliar humans (Bhattacharjee  
83 et al., 2017b). Additionally, they need to understand and decipher human intentions clearly. A  
84 recent study showed that very young pups of free-ranging dogs follow simple human pointing  
85 cues but learn to adjust the behavior when they grow up and start foraging events. A greater  
86 risk of negative impact from humans like beating, harassment and threatening are probably  
87 the prime reasons for such plasticity in point-following behavior (Bhattacharjee et al., 2017a).  
88 However, this study does not provide us insights into the dogs' understanding of social cues  
89 that are used by humans in day to day interactions with these dogs.

90 Here we used three different types of commonly used human social communicative cues  
91 while interacting with dogs on streets. The cues differed in terms of their actions and  
92 representations. The friendly cue illustrated an affiliative gesture, while the low and high  
93 impact threatening cues had negative display of gestures. In addition to the three cues, we  
94 used a neutral cue as control. We tested the responses of the dogs to the cues and investigated  
95 the influences in a post-cue food provision phase. We hypothesize that the dogs would enact  
96 positively upon receiving the friendly cue showing higher proximity and approach behavior.  
97 Additionally, the dogs would avoid human proximity and adjust their responses flexibly  
98 according to the impacts of the two threatening cues.

## 99 **MATERIALS AND METHODS**

### 100 **Subjects and study area**

101 We tested 120 adult, physically fit, solitary free-ranging dogs. Dogs were located randomly in  
102 different areas of West Bengal, India (see Supplementary **Figure S1**) for the experiment -  
103 Mohanpur (22°56'49''N and 88°32'4''E), Kalyani (22°58'30''N, 88°26'04''E), Sodepur  
104 (22°69'82''N and 88°38'95''E) and Kolkata (22°57'26''N, 88°36'39''E). Sexes of the dogs  
105 were determined by observing their genitals. To rule out any possibility of resampling, we  
106 tested dogs from different locations on different days and photographed each individual to  
107 collect information on coat color, scar marks and other morphological features.

### 108 **Experimental Procedure**

109 We used four different experimental conditions pertaining to various social cues in order to  
110 investigate the response of solitary free-ranging dogs towards an unfamiliar human. We  
111 tested separate sets of 30 dogs in each of the four experimental conditions. All the  
112 experimental trials were conducted on the same locations where the focal free-ranging dog  
113 was found (e.g. streets, markets, residential areas etc.). One piece of raw chicken (10-12g)  
114 was used as food. The experimenters (E1 and E2) were consistent throughout the study,  
115 played specific roles and were young males. Video recording was done from a distance using  
116 a Sony HDR-PJ410 camera mounted on a tripod.

117 The experimental conditions comprised of 2 major and 3 minor phases, carried out in the  
118 following order (Figure **S2**) –

119 **Attention seeking phase (minor)** - E2 attracted the attention of a solitary dog by making  
120 very short vocalization for 1-2 seconds (Bhattacharjee et al., 2017a). This step was necessary  
121 as we found some dogs lying down, resting or dozing. To keep the protocol consistent, E2  
122 carried out this step in all the four experimental conditions.

123 **Transition phase (minor)** - Once the dog was alerted, E2 immediately left the place and  
124 stood behind the camera, which was kept at a minimum distance of 4.5 m from the dog. E1  
125 arrived near the position where E2 was initially standing. This whole procedure was  
126 completed within 10 seconds.

127 **Social cue phase / SCP (major)** – E1 stood approximately 1.5 m away from the dog, facing  
128 it. Since the dogs were free-ranging and not on leash, E1 had to adjust his position in order to  
129 maintain the approximate distance of 1.5 m. After standing at the specified spot, E1 provided  
130 any of the predetermined social cue for 30 seconds –

- 131 • *Friendly Cue (FC)* - E1 displayed a positive gesture by bending slightly forward and  
132 extending both the arms (see Supplementary **Movie S1**). In India, people use similar  
133 gestures (sometimes clubbed with positive vocalisations) to provide positive social

134 rewards to dogs. E1, while providing the social cue, gazed and tried to maintain eye-  
 135 contact with the dog. E1 did not touch the focal dog deliberately in order to avoid any  
 136 potential bias of social contact.

- 137 • *Low impact threatening (LIT)* - E1 raised one of his hands (counterbalanced) and gazed at  
 138 the dogs (see Supplementary **Movie S2**). The cue differed from FC in having a negative  
 139 display of human gesture. People on the streets often raise one of their hands to scare,  
 140 threaten or shoo away dogs. We have adopted the same gesture in our protocol to  
 141 investigate the effects and associated responses.  
 142
- 143 • *High impact threatening (HIT)* - This phase differed from LIT in terms of impact. Here  
 144 E1 used a 0.45 m long solid wooden stick in his hand (counterbalanced) while providing  
 145 the gesture (see Supplementary **Movie S3**). E1 had to hide the wooden stick in the  
 146 transition phase before enacting the gesture.  
 147
- 148 • *Neutral Cue (NC)* - Here, E1 stood in a neutral posture and looked straight ahead and did  
 149 not enact any gesture.

150 **Food transfer phase (minor)** - Immediately after SCP, food was provisioned. E2 came  
 151 quickly, handed over the food to E1 and went back to his position behind the camera. The  
 152 process was completed within 10 seconds and care was taken to ensure that the focal dog did  
 153 not see the transfer of food to E1.

154 **Food provisioning phase / FPP (major)** - E1 again adjusted his position to keep the distance  
 155 consistent and placed the food on the ground. The food was placed at a distance of 0.3 m  
 156 from E1, thus at a distance of 1.2 m from the dog. E1 stood in a neutral position after placing  
 157 the food and looked straight ahead, without making eye contact with the dog (see  
 158 Supplementary **Movie S4**). FPP lasted 30 seconds or until the dog obtained the food,  
 159 whichever was earlier. Food was removed in case a dog did not obtain it.

160 Except for the SCP, all the other phases were constant and exactly similar across the  
 161 experimental conditions.

## 162 **Data Analysis and statistics**

163 We coded all the important behaviors relating to the experiment, which have been listed in  
 164 the ethogram below (**Table 1**).

165

166 **Table 1 - List of behaviors coded from the videos and their definitions**

167

| Phase | Behavior       |               | Definition                                                                                                                        |
|-------|----------------|---------------|-----------------------------------------------------------------------------------------------------------------------------------|
| SCP   | Approach       |               | Subject moved towards E1, distance between E1 and subject was $\leq 0.3$ m.                                                       |
|       | No approach    | Same position | Distance between E1 and subject was equal to 1.5 m.                                                                               |
|       |                | Distant       | Distance between E1 and subject was $> 1.5$ m.                                                                                    |
|       | First reaction |               | The first behaviour observed as a reaction to the social cue – gazing, gazing with tail wag, scared and moving back, no reaction. |

|     |                          |               |                                                                                                                                                                                                                                                                               |
|-----|--------------------------|---------------|-------------------------------------------------------------------------------------------------------------------------------------------------------------------------------------------------------------------------------------------------------------------------------|
|     | Demeanor (Holistic)      | Affiliative   | All behaviors towards E1 that are involved in the formation and maintenance of human-dog bonding. Includes attention seeking, proximity seeking, contact seeking, social facilitation, tail wagging, and relaxed posture (Rehn et al., 2013).                                 |
|     |                          | Aggressive    | Agonistic and/or aggressive (dominant or threatening) behavior towards E1. Includes mouthing, biting clothing, jumping up, snapping, growling, baring the teeth, stiff posture, staring and/or "whale-eyeing," high, stiff tail carriage, piloerection (Overall, 2014).       |
|     |                          | Anxious       | Anxious or fearful behavior towards E1. Includes shaking (trembling), excessive panting, lip-licking, urination, tail between the legs, running away, flinching, corners of the mouth retracted down and back. May be maintaining distance from the E1 (Lindsay, 2005).       |
|     |                          | Neutral       | Demeanour that is not otherwise covered in this ethogram. May include resting and sleeping during the experiment, exploratory behavior not directed at E1 or food (sniffing, digging, chewing, scent rolling), self-care (scratching, licking), or general disinterest in E1. |
|     | Human Proximity          |               | Distance between E1 and subject was $\leq 0.3$ m.                                                                                                                                                                                                                             |
|     | Gazing at human          |               | Subject is sitting, standing, or lying and focused on (muzzle turned towards) E1's body or face. Cumulative duration of gazing / looking behavior at E1.                                                                                                                      |
| FPP | Approach                 |               | Subject moved towards E1, distance between food and subject was $\leq 0.3$ m.                                                                                                                                                                                                 |
|     | No approach              | Same position | Distance between food and subject was equal to 1.2 m.                                                                                                                                                                                                                         |
|     |                          | Distant       | Distance between food and subject was $> 1.2$ m.                                                                                                                                                                                                                              |
|     | Latency                  |               | Time taken to obtain the food after its provision on the ground. Valid only for subjects that obtained food.                                                                                                                                                                  |
|     | Feeding time (proximity) |               | Time taken to eat the food in front of E1. Distance of subject and human should be $\leq 0.3$ m. Distant ( $> 0.3$ m) feeding or taking food away was not considered.                                                                                                         |
|     | Gazing at human          |               | Same as social cue phase.                                                                                                                                                                                                                                                     |

168

169 Shapiro -Wilk tests were used to check for normality of the data. We found the data to be not  
 170 normally distributed, thus non-parametric tests were carried out. Generalised linear models  
 171 (GLM) were performed using "lme4" package of R Studio. AIC values were compared in  
 172 order to get the best-fitting models. A second coder naïve to the purpose of the study coded  
 173 20% of the data to check inter-rater reliability. It was perfect for number of approach  
 174 (cohen's kappa = 1.00), almost perfect for duration of proximity (cohen's kappa = 0.93),  
 175 gazing (cohen's kappa = 0.90) and latency (cohen's kappa = 0.96). The alpha level was 0.05  
 176 throughout the analysis. Post-hoc comparisons were done with Bonferroni correction method

177 whenever required. Statistical analyses were performed using R (R Development Core Team,  
178 2015) and StatistiXL version 1.11.0.0.

## 179 RESULTS

180 Various statistical tests were carried out for the analysis. Since we have compared parameters  
181 of the major phases in all possible combinations, description of some of the post-hoc  
182 statistical tests were presented in supplementary material to avoid congestion in the main text.

183 *Number approached* - Dogs approached differently in SCP and FPP of the four conditions  
184 (Contingency  $\chi^2$ :  $\chi^2 = 10.439$ ,  $df = 3$ ,  $p = 0.015$ , **Figure 1**). In the NC condition, initially 4  
185 individuals approached, while the number increased to 17 in FPP, the change being  
186 statistically significant (Goodness of fit  $\chi^2$ :  $\chi^2 = 8.048$ ,  $df = 1$ ,  $p = 0.005$ ), thereby indicating a  
187 distinct positive impact of food. However, we did not find any difference between the two  
188 phases in the FC condition as dogs equally responded to both positive gestures (25) and food  
189 (30), more than expected by chance alone (Goodness of fit  $\chi^2$ :  $\chi^2 = 0.455$ ,  $df = 1$ ,  $p = 0.50$ ).  
190 The LIT condition had a very momentary impact as only 1 individual approached in SCP,  
191 while 13 individuals approached in FPP (Goodness of fit  $\chi^2$ :  $\chi^2 = 10.246$ ,  $df = 1$ ,  $p = 0.001$ ).  
192 Thus, dogs flexibly adjusted their behavior and tended to approach more when food was  
193 provided. Unlike the LIT condition, we found a strong effect of HIT, where none of the  
194 individuals approached initially and only 1 (Goodness of fit  $\chi^2$ :  $\chi^2 = 1.000$ ,  $df = 1$ ,  $p = 0.317$ )  
195 in the later phase, when the food reward was offered. This was suggestive of the dogs'  
196 perception of human intentions based on an immediate encounter.

197 We compared the number of approaches across conditions for both SCP and FPP.  
198 Significantly higher number of dogs approached in SCP in response to FC, as compared to  
199 the NC, LIT and HIT conditions (see Supplementary **Table S1**). We noticed a marginal  
200 difference between the NC and HIT conditions (see Supplementary **Table S1**). Additionally,  
201 the number of approaches in the SCP of LIT did not differ from NC and HIT conditions (see  
202 Supplementary **Table S1**).

203 Comparison of the number of approaches among FPP of the four conditions revealed  
204 interesting results. Dogs approached significantly more in FC compared to LIT (Goodness of  
205 fit  $\chi^2$ :  $\chi^2 = 6.721$ ,  $df = 1$ ,  $p = 0.010$ ) and HIT (Goodness of fit  $\chi^2$ :  $\chi^2 = 27.129$ ,  $df = 1$ ,  $p <$   
206  $0.0001$ ), but not NC (Goodness of fit  $\chi^2$ :  $\chi^2 = 3.596$ ,  $df = 1$ ,  $p = 0.058$ ), again implying the  
207 role of the food provisioned. In the HIT condition, the number of dogs that approached was  
208 significantly lower than the LIT condition (Goodness of fit  $\chi^2$ :  $\chi^2 = 10.286$ ,  $df = 1$ ,  $p = 0.001$ ),  
209 suggesting an influence of the HIT cue which even surpassed the impact of food. In addition,  
210 we also found that the HIT cue differed from NC, but the number of approaches in FPP of  
211 LIT and NC conditions were comparable (see Supplementary **Table S1**). These results  
212 together reinforce the idea that dogs were capable of differentiating between the high and low  
213 impact threatening cues, and act accordingly, to maximize their chances of obtaining the food  
214 reward while avoiding serious threat.

215 *No approach* – We calculated the number of individuals in different conditions that did not  
216 approach and further divided the numbers in two subcategories – ‘same’ and ‘distant’  
217 position (see **Table 1**). Here we laid emphasis on the ‘distant’ position which served as a  
218 correlate of negative impact. Consistent with our hypothesis, we could not see any dog  
219 running or moving away in the NC and FC conditions, thereby dogs exclusively showed no  
220 approach of ‘same position’ subcategory. Thus, we analysed the data only from LIT and HIT  
221 conditions. We used the percentage of responses out of the total “no approach” cases for all  
222 the comparisons.

223 52% and 24% of the dogs were distant in SCP and FPP respectively, in the LIT condition  
224 (Goodness of fit  $\chi^2: \chi^2 = 10.316$ ,  $df = 1$ ,  $p = 0.001$ , **Figure 2**). Consistent with this, we also  
225 found dogs showing significantly more distant positions in SCP (73%) than the FPP (45%) of  
226 the HIT condition (Goodness of fit  $\chi^2: \chi^2 = 6.644$ ,  $df = 1$ ,  $p = 0.01$ , **Figure 2**). Further  
227 comparisons revealed a significant difference between the FPP of LIT and HIT conditions  
228 (Goodness of fit  $\chi^2: \chi^2 = 6.391$ ,  $df = 1$ ,  $p = 0.011$ , **Figure 2**), where higher numbers of dogs  
229 stayed at the ‘distant’ position in the HIT condition. However, we did not find any difference  
230 between the SCP of the two conditions (Goodness of fit  $\chi^2: \chi^2 = 3.528$ ,  $df = 1$ ,  $p = 0.060$ ).

231 *First reaction to a social cue* – Quantification of the first reaction was important in terms of  
232 impact and effect of the social cues. We found that the reactions (see **Table 1**) were  
233 distributed differently in the four experimental conditions. In the NC condition, dogs showed  
234 varying levels of reactions. 60% of the dogs showed gazing behavior, 10% showed gazing  
235 with tail wagging, 30% stayed neutral and displayed no particular reaction. None of the dogs  
236 showed a fear response. We found a significant difference among the proportion of  
237 individuals showing the different reactions (Goodness of fit  $\chi^2: \chi^2 = 25.200$ ,  $df = 3$ ,  $p <$   
238  $0.0001$ , **Figure 3A**). Gazing and no reaction were comparable and displayed at a higher rate  
239 than other behaviors (see Supplementary **Table S1**). In the FC condition, we found 80% of  
240 the dogs showing gazing with tail wagging as their first reaction, while 20% showed gazing  
241 behavior only. No dog showed a fear response, and all dogs responded. Gazing with tail  
242 wagging occurred at a significantly higher rate than only gazing behavior (Goodness of fit  $\chi^2:$   
243  $\chi^2 = 10.800$ ,  $df = 1$ ,  $p = 0.001$ , **Figure 3B**). Except for a single individual, all the dogs reacted  
244 in the LIT condition. 60% of the dogs showed fear response to the social cue at a significantly  
245 higher rate than both gazing (20%) and gazing with tail wagging (17%) behaviors (Gazing –  
246 Goodness of fit  $\chi^2: \chi^2 = 6.000$ ,  $df = 1$ ,  $p = 0.014$ ; Gazing with tail wagging – Goodness of fit  
247  $\chi^2: \chi^2 = 7.348$ ,  $df = 1$ ,  $p = 0.007$ , **Figure 3C**). In the HIT condition, 97% of the dogs showed  
248 fear response when the threatening gesture was enacted, whereas only one individual  
249 displayed gazing with tail wagging (Goodness of fit  $\chi^2: \chi^2 = 26.133$ ,  $df = 1$ ,  $p < 0.0001$ ,  
250 **Figure 3D**).

251 *Demeanor* – Dogs displayed mostly neutral (43%) and anxious (43%) behaviors in the NC  
252 condition. Affiliative behaviors were shown at a lower rate than both the neutral and anxious  
253 behaviors (Goodness of fit  $\chi^2: \chi^2 = 4.765$ ,  $df = 1$ ,  $p = 0.029$ , **Figure 4**). Agonistic or  
254 aggressive behaviors were absent. Unlike the outcomes in NC, majority of dogs (80%)  
255 showed affiliative behaviors, rather than neutral (Goodness of fit  $\chi^2: \chi^2 = 12.448$ ,  $df = 1$ ,  $p <$   
256  $0.0001$ ) and anxious behaviors (Goodness of fit  $\chi^2: \chi^2 = 21.160$ ,  $df = 1$ ,  $p < 0.0001$ ) in FC.  
257 Aggression was not observed. In the LIT condition, 57% of the dogs showed anxious  
258 behaviors, which was higher than all the other three categories - (Neutral – Goodness of fit  
259  $\chi^2: \chi^2 = 6.545$ ,  $df = 1$ ,  $p = 0.011$ ; Affiliative - Goodness of fit  $\chi^2: \chi^2 = 6.545$ ,  $df = 1$ ,  $p = 0.011$ ;  
260 Aggressive – Goodness of fit  $\chi^2: \chi^2 = 9.800$ ,  $df = 1$ ,  $p = 0.002$ ). 97% of the dogs showed  
261 anxious behaviors in HIT condition. However, we did not see a statistical difference between  
262 the levels of anxious behavior shown in LIT and HIT conditions (Goodness of fit  $\chi^2: \chi^2 =$   
263  $3.130$ ,  $df = 1$ ,  $p < 0.07$ ).

264 *Human proximity* – Dogs showed varying levels of proximity to the human experimenter in  
265 the different conditions (Kruskal – Wallis test,  $\chi^2 = 77.127$ ,  $df = 3$ ,  $p < 0.0001$ , **Figure 5**).  
266 Post-hoc pairwise comparisons revealed that the duration of human proximity was higher in  
267 the FC condition compared to others (see Supplementary **Table S1**). However, we did not  
268 find any difference between the duration of human proximity in the NC, LIT and HIT  
269 conditions (see Supplementary **Table S1**), indicating a general avoidance of human proximity  
270 in free-ranging dogs.

271 *Gazing* – GLM analysis revealed that both the LIT and the HIT conditions are significant  
 272 predictors of gazing at E1 in the SCP (**Figure 6, Table 2**).

273 **Table 2 – GLM results showing the effect of experimental conditions on gazing behavior**  
 274 **in the SCP.**

|               | estimate | Standard error | z- value | Pr(> z )     |
|---------------|----------|----------------|----------|--------------|
| fixed effects |          |                |          |              |
| Intercept     | 1.75786  | 0.07581        | 23.188   | < 2e-16 ***  |
| Condition FC  | 0.01143  | 0.10691        | 0.107    | 0.914865     |
| Condition HIT | 0.43937  | 0.09722        | 4.520    | 6.2e-06 ***  |
| Condition LIT | 0.37828  | 0.09841        | 3.844    | 0.000121 *** |

275

276 Interestingly, in the FPP, we found all the different conditions to be significantly contributing  
 277 to the prediction of the duration of gazing behavior (**Figure 6, Table 3**). Dogs gazed the least  
 278 ( $0.46 \pm 1.69$  sec) in the FPP of the FC condition.

279 **Table 3 – GLM results showing the effect of experimental conditions on gazing behavior**  
 280 **in the FPP.**

|               | estimate | Standard error | z- value | Pr(> z )     |
|---------------|----------|----------------|----------|--------------|
| fixed effects |          |                |          |              |
| Intercept     | 1.1206   | 0.1043         | 10.748   | < 2e-16 ***  |
| Condition FC  | -1.8827  | 0.2869         | -6.563   | 5.28e-11 *** |
| Condition HIT | 0.6315   | 0.1290         | 4.894    | 9.88e-07 *** |
| Condition LIT | 0.4822   | 0.1326         | 3.636    | 0.000277 *** |

281

282 *Latency and feeding time (food provision phase only)* – Individuals who approached the food,  
 283 were considered for the latency comparisons ( $N = 60$ ). We excluded the HIT condition from  
 284 the analysis as only one dog approached and obtained the food reward. Individuals showed  
 285 different latencies in the three conditions while approaching for the food (Kruskal – Wallis  
 286 test,  $\chi^2 = 34.011$ ,  $df = 2$ ,  $p < 0.0001$ , see Supplementary **Figure S3**). In the FC condition, the  
 287 dogs approached faster than the NC (Mann – Whitney U test,  $U = 452.000$ ,  $df1 = 17$ ,  $df2 =$   
 288  $30$ ,  $p < 0.0001$ ) and LIT (Mann – Whitney U test,  $U = 374.000$ ,  $df1 = 30$ ,  $df2 = 13$ ,  $p <$   
 289  $0.0001$ ) conditions. Latencies were comparable in the NC and LIT conditions (Mann –  
 290 Whitney U test,  $U = 156.500$ ,  $df1 = 17$ ,  $df2 = 13$ ,  $p = 0.053$ ).

291 We found one individual in the FC condition that approached but did not obtain the reward.  
 292 Thus, we removed the data point for the analysis of feeding time ( $N = 59$ ). We found a  
 293 significant difference in feeding time (Kruskal – Wallis test,  $\chi^2 = 8.366$ ,  $df = 2$ ,  $p = 0.015$ , see  
 294 Supplementary **Figure S4**). Post-hoc pairwise comparisons further revealed a significant  
 295 difference between feeding times of FC and LIT conditions (Mann – Whitney U test,  $U =$   
 296  $298.000$ ,  $df1 = 29$ ,  $df2 = 13$ ,  $p = 0.002$ ). Short feeding time in the LIT condition ( $2.77 \pm 0.72$   
 297 sec) compared to FC ( $4.58 \pm 2.02$  sec) might be an indication of dogs' insecurities due to  
 298 negative human influence, leading to faster consumption of the food reward. Moreover, we  
 299 did not see any difference between the other two comparisons (see Supplementary **Table S1**).

## 300 DISCUSSION

301 Our results underline the free-ranging dogs' behavioral plasticity in the context of  
 302 interactions with unfamiliar humans. Dogs adjusted their behavior and showed situation-  
 303 relevant response to the social cues. Overall, they exhibited a tendency to approach more



304 when food was provisioned compared to the social cue phases, emphasizing the dependence  
305 on humans for sustenance. However, comparable but higher levels of approach in the FC  
306 condition identified an important role of positive social actions from humans, in order to  
307 encourage the initiation of an affiliative relationship. The comparatively higher duration of  
308 human proximity in the FC further strengthens this statement. The influence of low-impact  
309 threatening cues was very momentary while the effect of the high-impact threatening cues  
310 remained even when food was provided. Moreover, dogs avoided the unfamiliar human (E1)  
311 with a comparatively higher distance in HIT compared to LIT. Thus, dogs were able to  
312 distinguish between the impacts of the threatening cues and responded accordingly,  
313 illustrating an optimized strategy. Additionally, the initial reactions and demeanors were  
314 consistent with the differential approach of dogs to the corresponding cues.

315 Apart from showing affiliative responses in the FC condition, dogs showed adjustments and  
316 plasticity in their anxious or fearful responses during the threatening cue conditions. Gazing  
317 behavior in SCP was predicted by LIT and HIT conditions as dogs gazed more, probably  
318 indicating their hesitant nature to approach and also gauging human intentions. On the other  
319 hand, FC, LIT and HIT conditions predicted the gazing response in FPP. It is important to  
320 note that the short duration of gazing at E1 in the FC condition could be the linked to dogs'  
321 certainty due to affiliative human action. This was also supported by a significantly faster  
322 approach to the food. Moreover, dogs depicted a tendency to spend more time while feeding  
323 in the FC condition compared to LIT. Thus, the free-ranging dogs acted very specifically in  
324 the different conditions displaying a range of social responses that had a high degree of parity  
325 with the social cue provided in the experiment. .

326 Free-ranging dogs live in human dominated environments and heavily depend on humans for  
327 food (Bhadra et al., 2016; Bhadra and Bhadra, 2014). Apart from scavenging, they directly  
328 beg for food from humans (Bhadra and Bhadra, 2014; Sen Majumder et al., 2014). However,  
329 getting or retrieving food items can lead to consequences like beating and harassment, which  
330 probably have made these dogs opportunistic. In order to avoid negative human impact and  
331 maximize the success of getting food, dogs need to identify reliable humans. General  
332 avoidance of direct physical contact with unfamiliar humans (Bhattacharjee et al., 2017b)  
333 may be a process involved in the same strategy. However, the flexibility might have been  
334 achieved by dogs upon receiving positive human reinforcements. For example, adult free-  
335 ranging dogs have earlier been shown to adjust their point-following behavior based on  
336 reliability of unfamiliar humans (Bhattacharjee et al., 2017a). Interestingly, pet dogs have  
337 been shown to trusting unfamiliar humans in a range of scenarios (see review Hare and  
338 Woods, 2013), which could possibly be result of solely positive interspecific interactions.  
339 Nevertheless, pets are sensitive to behaviors of strangers (Vas et al., 2005), consistent with  
340 the results of this study.

341 Dogs' differential and situation-specific approach behaviors can be explained by early social  
342 interactions with humans (Fox and Stelzner, 1966). The role of domestication is also  
343 undeniable, which facilitated dogs' understanding and sensitivity towards human social cues.  
344 It has been shown that even hand-reared wolves (*Canis lupus lupus*), being the closest  
345 ancestors of modern day dogs failed to adjust behaviors while interacting with humans in  
346 ambiguous situations (Bradshaw and Nott, 1995). Thus, an interplay of domestication and  
347 factors like living environment and experience with humans might be the basis of the overall  
348 outcomes.

349 The current experimental design only evaluates dogs' understanding and sensitivity of human  
350 social actions. One potential short-coming of the study was not being able to track individuals  
351 and failing to incorporate factors like frequency of positive and negative interactions with

352 humans in their daily lives. Follow-up studies in different geographic regions with varying  
353 levels of human influences could be done to see the larger picture. On the brighter side, this  
354 study has helped to identify a key element in the ecology of the dog-human relationship, the  
355 ability of the dogs to assess a social cue (and thus intent) of unfamiliar humans, which  
356 explains why dogs are one of the most successful species in sharing the same niche with  
357 humans.

358

## 359 REFERENCES

- 360 Bertness, M. D., and Callaway, R. (1994). Positive interactions in communities. *Trends Ecol.*  
361 *Evol.* doi:10.1016/0169-5347(94)90087-6.
- 362 Bhadra, A., and Bhadra, A. (2014). Preference for meat is not innate in dogs. *J. Ethol.* 32,  
363 15–22. doi:10.1007/s10164-013-0388-7.
- 364 Bhadra, A., Bhattacharjee, D., Paul, M., Singh, A., Gade, P. R., Shrestha, P., et al. (2016).  
365 The meat of the matter: a rule of thumb for scavenging dogs? *Ethol. Ecol. Evol.* 28, 427–  
366 440. doi:10.1080/03949370.2015.1076526.
- 367 Bhattacharjee, D., N., N. D., Gupta, S., Sau, S., Sarkar, R., Biswas, A., et al. (2017a). Free-  
368 ranging dogs show age related plasticity in their ability to follow human pointing. *PLoS*  
369 *One* 12, e0180643. doi:10.1371/journal.pone.0180643.
- 370 Bhattacharjee, D., Sau, S., Das, J., and Bhadra, A. (2017b). Free-ranging dogs prefer petting  
371 over food in repeated interactions with unfamiliar humans. *J. Exp. Biol.* 220, 4654–  
372 4660. doi:10.1242/jeb.166371.
- 373 Boitani, L., and Ciucci, P. (1995). Comparative social ecology of feral dogs and wolves.  
374 *Ethol. Ecol. Evol.* 7, 49–72. doi:10.1080/08927014.1995.9522969.
- 375 Bradshaw, J. W. S., and Nott, H. M. R. (1995). “Social and Communication Behaviour of  
376 Companion Dogs,” in *The Domestic Dog: Its Evolution, Behaviour and Interactions*  
377 *with People*.
- 378 Dorey, N. R., Udell, M. A. R., and Wynne, C. D. L. (2010). When do domestic dogs, *Canis*  
379 *familiaris*, start to understand human pointing? The role of ontogeny in the development  
380 of interspecies communication. *Anim. Behav.* 79, 37–41.  
381 doi:10.1016/j.anbehav.2009.09.032.
- 382 Fox, M. W., and Stelzner, D. (1966). Approach/withdrawal variables in the development of  
383 social behaviour in the dog. *Anim. Behav.* 14, 362–366. doi:10.1016/S0003-  
384 3472(66)80098-2.
- 385 Hare, B., Brown, M., Williamson, C., and Tomasello, M. (2002). The domestication of social  
386 cognition in dogs. *Science* 298, 1634–6. doi:10.1126/science.1072702.
- 387 Hare, B., and Tomasello, M. (2005). Human-like social skills in dogs? *Trends Cogn. Sci.* 9,  
388 439–444. doi:10.1016/j.tics.2005.07.003.
- 389 Hare, B., and Woods, V. (2013). *The Genius of Dogs: Discovering the Unique Intelligence of*  
390 *Man’s Best Friend*. First Edition. NY: Dutton .
- 391 Hughes, J., and Macdonald, D. W. (2013). A review of the interactions between free-roaming  
392 domestic dogs and wildlife. *Biol. Conserv.* 157, 341–351.

- 393 doi:10.1016/j.biocon.2012.07.005.
- 394 Larson, G., Karlsson, E. K., Perri, A., Webster, M. T., Ho, S. Y. W., Peters, J., et al. (2012).  
395 Rethinking dog domestication by integrating genetics, archeology, and biogeography.  
396 *Proc. Natl. Acad. Sci.* 109, 8878–8883. doi:10.1073/pnas.1203005109.
- 397 Lindsay, S. R. (2005). *Handbook of Applied Dog Behavior and Training, Volume Three.* , ed.  
398 S. R. Lindsay Ames, Iowa, USA: Blackwell Publishing Professional  
399 doi:10.1002/9780470344514.
- 400 Sen Majumder, S., Bhadra, A., Ghosh, A., Mitra, S., Bhattacharjee, D., Chatterjee, J., et al.  
401 (2014). To be or not to be social: foraging associations of free-ranging dogs in an urban  
402 ecosystem. *Acta Ethol.* 17, 1–8. doi:10.1007/s10211-013-0158-0.
- 403 Miklósi, A., Polgárdi, R., Topál, J., and Csányi, V. (2000). Intentional behaviour in dog-  
404 human communication: an experimental analysis of “showing” behaviour in the dog.  
405 *Anim. Cogn.* 3, 159–166. doi:10.1007/s100710000072.
- 406 Miklósi, Á., and Soproni, K. (2006). A comparative analysis of animals’ understanding of the  
407 human pointing gesture. *Anim. Cogn.* 9, 81–93. doi:10.1007/s10071-005-0008-1.
- 408 Morey, D. F. (2006). Burying key evidence: the social bond between dogs and people. *J.*  
409 *Archaeol. Sci.* 33, 158–175. doi:10.1016/j.jas.2005.07.009.
- 410 Nagasawa, M., Murai, K., Mogi, K., and Kikusui, T. (2011). Dogs can discriminate human  
411 smiling faces from blank expressions. *Anim. Cogn.* 14, 525–533. doi:10.1007/s10071-  
412 011-0386-5.
- 413 Overall, K. L. (2014). The ethogram project. *J. Vet. Behav. Clin. Appl. Res.* 9, 1–5.  
414 doi:10.1016/j.jveb.2013.12.001.
- 415 Paul, M., Sen Majumder, S., Sau, S., Nandi, A. K., and Bhadra, A. (2016). High early life  
416 mortality in free-ranging dogs is largely influenced by humans. *Sci. Rep.* 6, 19641.  
417 doi:10.1038/srep19641.
- 418 Perri, A. (2016). A wolf in dog’s clothing: Initial dog domestication and Pleistocene wolf  
419 variation. *J. Archaeol. Sci.* 68, 1–4. doi:10.1016/j.jas.2016.02.003.
- 420 R Development Core Team (2015). R: A language and environment for statistical computing.  
421 R Foundation for Statistical Computing, Vienna, Austria. URL [http://www.R-](http://www.R-project.org/)  
422 [project.org/](http://www.R-project.org/). *R Found. Stat. Comput. Vienna, Austria.*
- 423 Rehn, T., McGowan, R. T. S., and Keeling, L. J. (2013). Evaluating the Strange Situation  
424 Procedure (SSP) to Assess the Bond between Dogs and Humans. *PLoS One* 8, e56938.  
425 doi:10.1371/journal.pone.0056938.
- 426 Takaoka, A., Maeda, T., Hori, Y., and Fujita, K. (2015). Do dogs follow behavioral cues  
427 from an unreliable human? *Anim. Cogn.* 18, 475–483. doi:10.1007/s10071-014-0816-2.
- 428 Thompson, J. N. (1999). The Evolution of Species Interactions. *Science* (80-. ). 284, 2116–  
429 2118. doi:10.1126/science.284.5423.2116.
- 430 Vas, J., Topál, J., Gácsi, M., Miklósi, Á., and Csányi, V. (2005). A friend or an enemy?  
431 Dogs’ reaction to an unfamiliar person showing behavioural cues of threat and  
432 friendliness at different times. *Appl. Anim. Behav. Sci.* 94, 99–115.  
433 doi:10.1016/j.applanim.2005.02.001.

434 Wynne, C. D. L., Udell, M. A. R., and Lord, K. A. (2008). Ontogeny's impacts on human–  
435 dog communication. *Anim. Behav.* 76, e1–e4. doi:10.1016/j.anbehav.2008.03.010.

436

#### 437 AUTHOR CONTRIBUTIONS

438 DB and AB conceived and designed the study. DB and SS performed the field experiments as  
439 E1 and E2 respectively. DB coded the videos and analysed the data. The initial draft was  
440 written by DB and later reviewed and edited by AB. AB supervised the work. All authors  
441 gave final approval for publication.

442

#### 443 FUNDING

444 DB was supported by INSPIRE Fellowship, Department of Science and Technology (DST),  
445 Govt. of India. SS was supported by a fellowship from the project fellowship (Project No.  
446 EMR/2016/000595) from Science and Engineering Research Board (SERB). The study was  
447 supported by IISER Kolkata. The funders had no role in study design, collection of data and  
448 analysis, decision to publish and preparation of the manuscript.

#### 449 ACKNOWLEDGEMENTS

450 The authors would like to thank Indian Institute of Science Education and Research – Kolkata  
451 (IISER – K) for providing infrastructural support.

452

#### 453 CONFLICT OF INTEREST STATEMENT

454 The authors declare no competing or financial interests.

455

#### 456 Figure legends -

457 **Figure 1. Number of approaches.** Bar graph showing the number of approaches in the SCP  
458 and FPP of the four experimental conditions – NC, FC, LIT and HIT. Number of dogs that  
459 approached varied between the phases across the conditions (Contingency  $\chi^2$ :  $\chi^2 = 10.439$ ,  $df$   
460  $= 3$ ,  $p = 0.015$ ). Asterisks indicated significant differences. The dotted line indicated the  
461 chance level (50%).

462 **Figure 2. Percentage of distant position out of “no approach”.** Bar graph showing the  
463 percentage of dogs that showed distant position out of “no approach” in the SCP and FPP of  
464 LIT and HIT conditions. Dogs showed significantly more distant positions in both the SCP  
465 compared to FPP of LIT (Goodness of fit  $\chi^2$ :  $\chi^2 = 10.316$ ,  $df = 1$ ,  $p = 0.001$ ) and HIT  
466 (Goodness of fit  $\chi^2$ :  $\chi^2 = 6.644$ ,  $df = 1$ ,  $p = 0.01$ ) conditions. Asterisks indicated significant  
467 differences.

468 **Figure 3. First reaction to social cue.** Pie charts showing the first reaction (behaviors) to  
469 social cues. (A) Distribution of behavioral responses in NC condition, (B) Distribution of  
470 behavioral responses in FC condition, (C) Distribution of behavioral responses in LIT  
471 condition, (D) Distribution of behavioral responses in HIT condition.

472 **Figure 4. Demeanours (Holistic).** Stacked bar graph showing the demeanours of dogs in  
473 SCP of NC, FC, LIT and HIT conditions.

474 **Figure 5. Duration of human proximity.** Box and whisker plot illustrating the duration of  
475 human proximity of dogs in SCP of NC, FC, LIT and HIT condition. Dog showed  
476 significantly higher proximity to E1 in the FC ( $12.43 \pm 9.54$  sec) than in other conditions.  
477 Boxes represent interquartile range, horizontal bars within boxes indicate median values, and  
478 whiskers represent the upper range of the data. “a” and “b” indicate significant differences.

479 **Figure 6. Duration of gazing.** Box and whiskers plot showing the duration of gazing at E1  
480 in SCP and FPP of NC, FC, LIT and HIT conditions. Boxes represent interquartile range,  
481 horizontal bars within boxes indicate median values, and whiskers represent the upper range  
482 of the data.

483

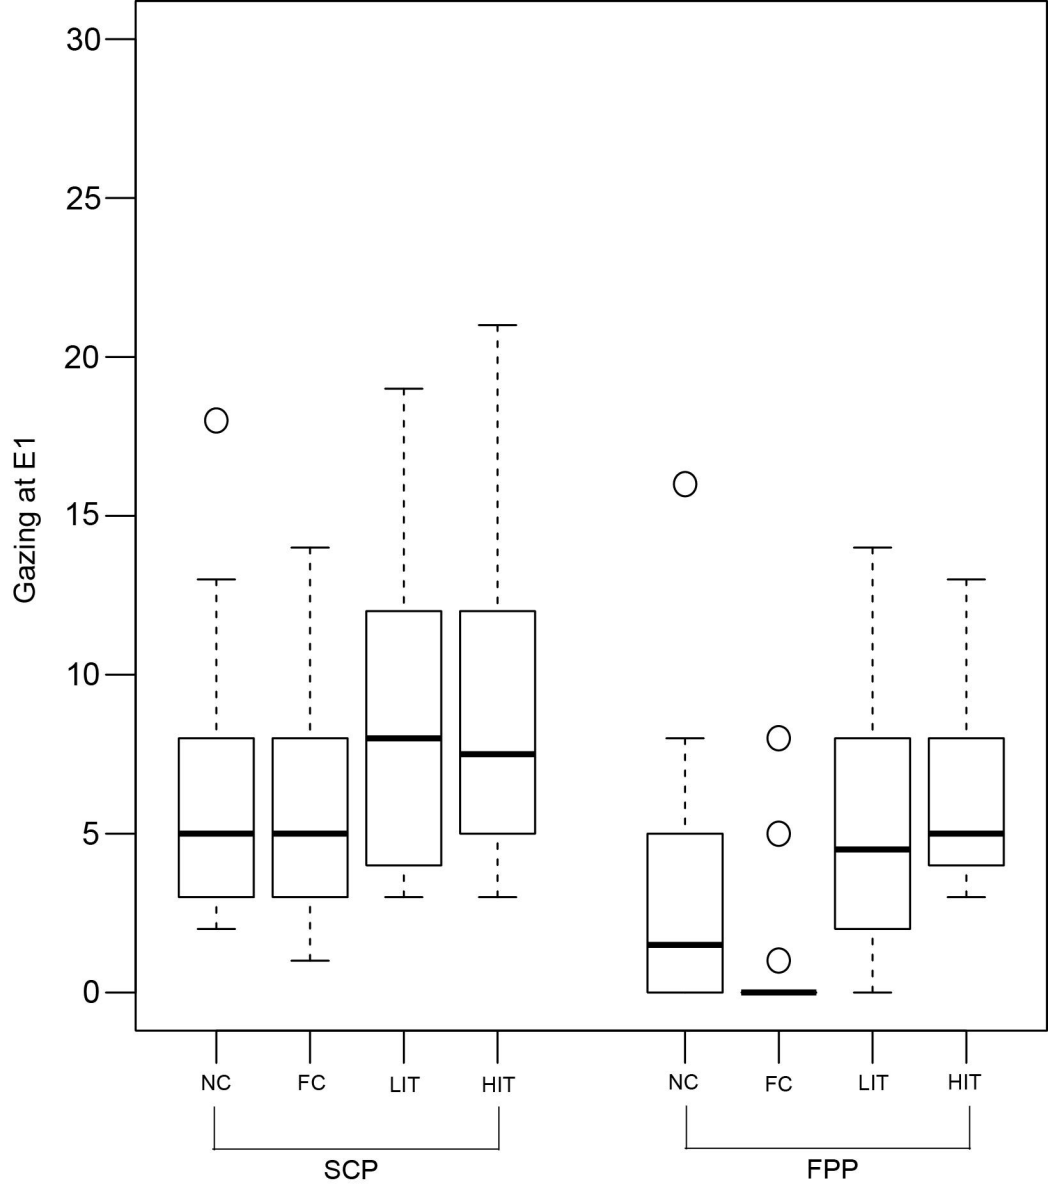

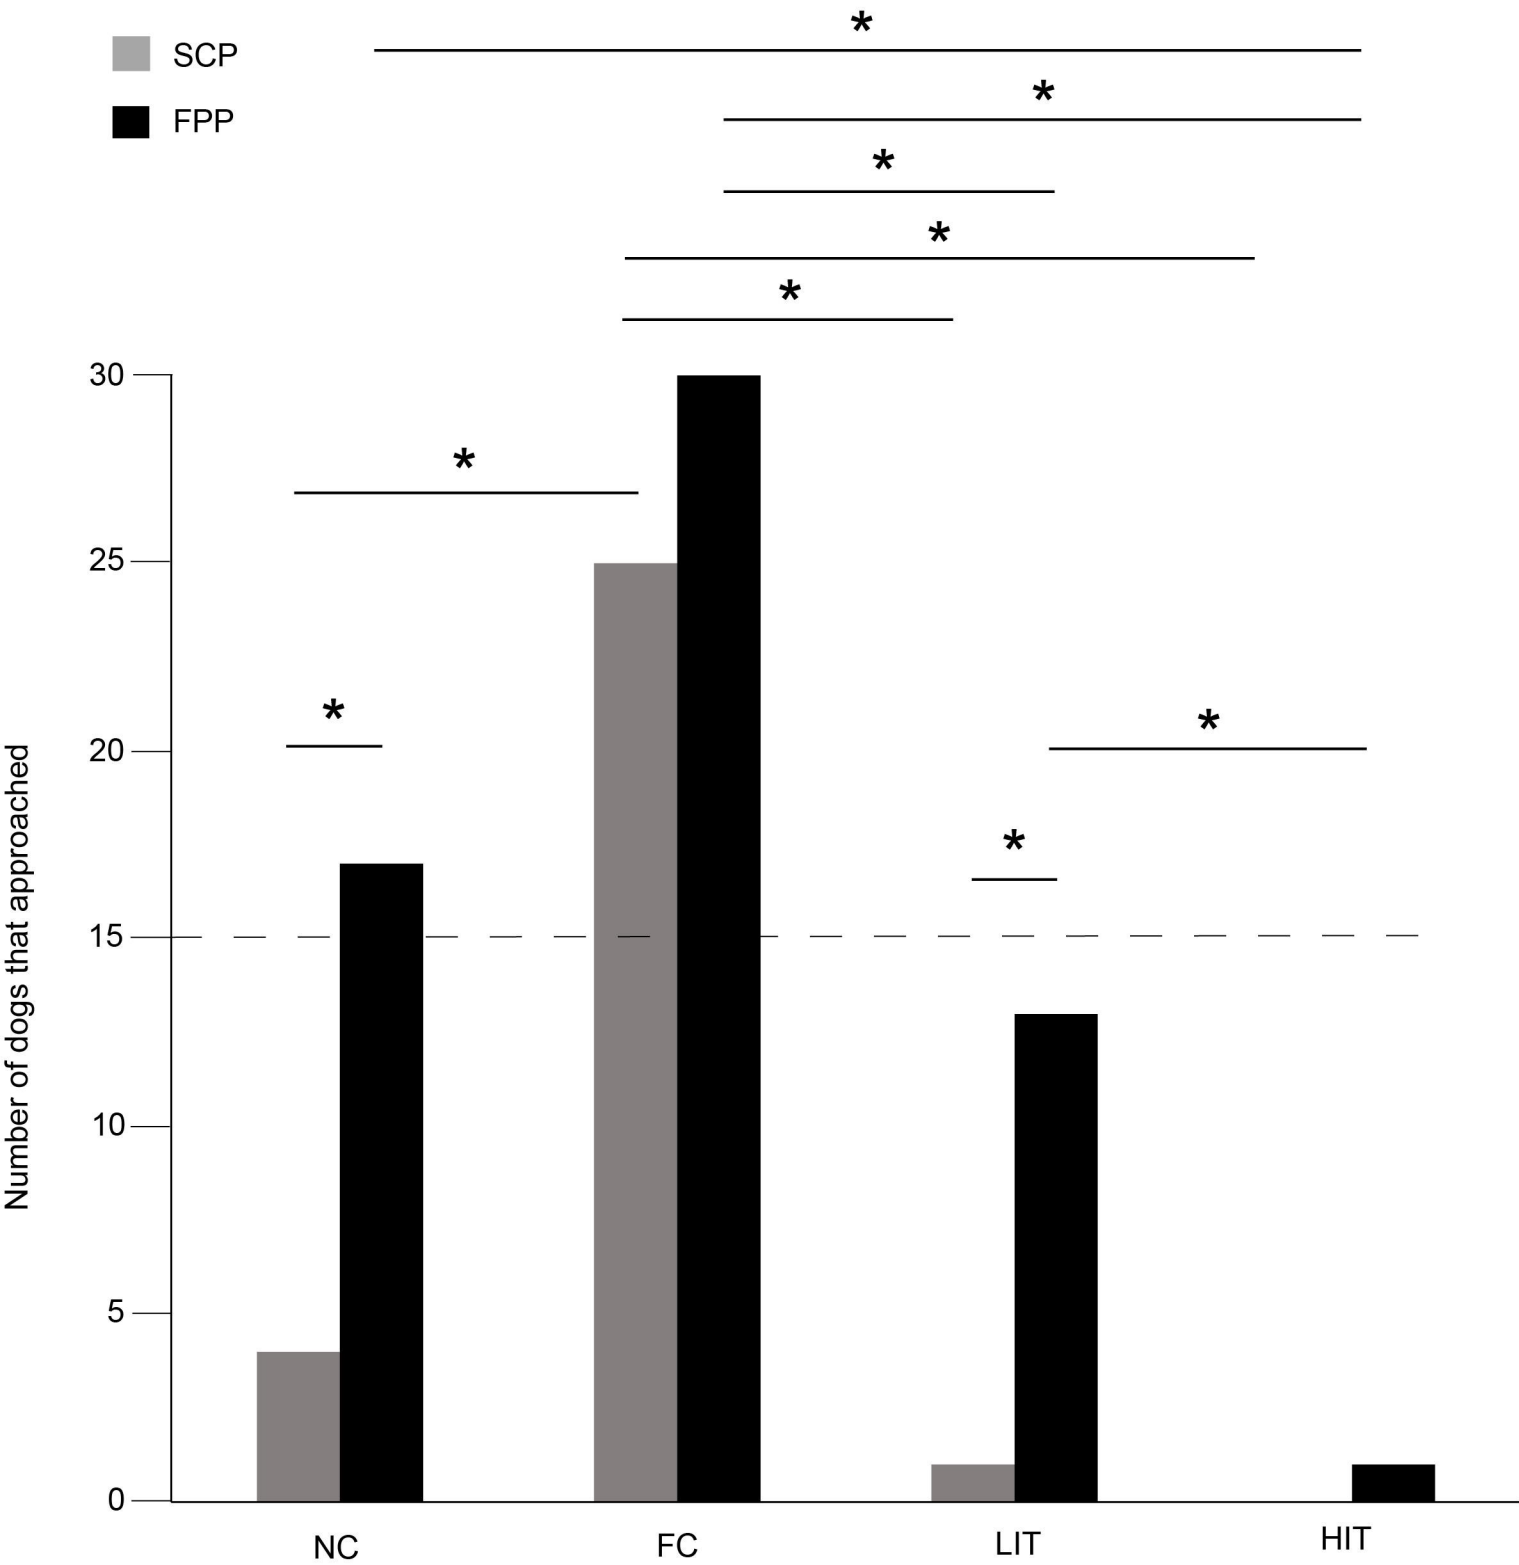

SCP  
FPP

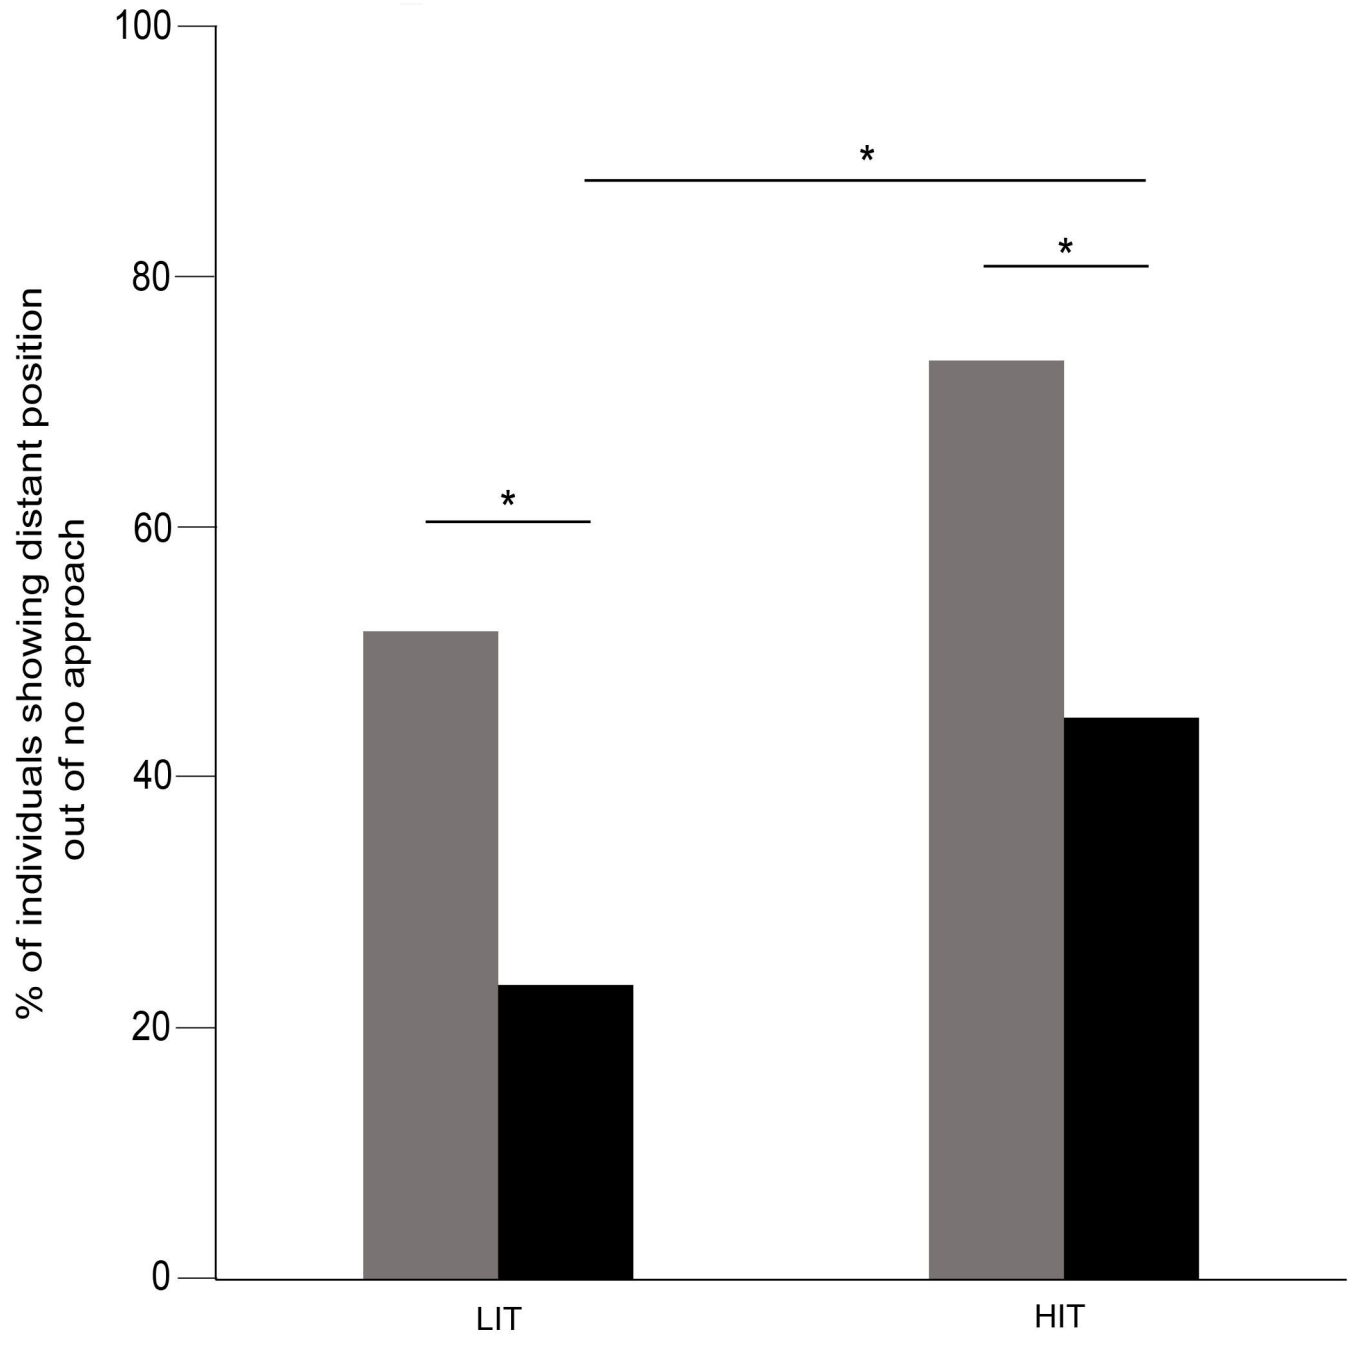



(A)

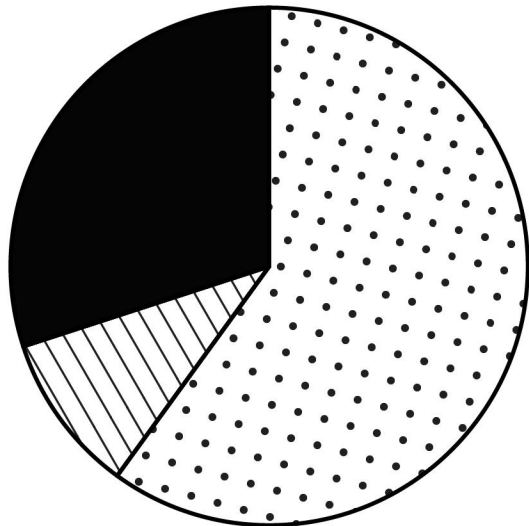

(B)

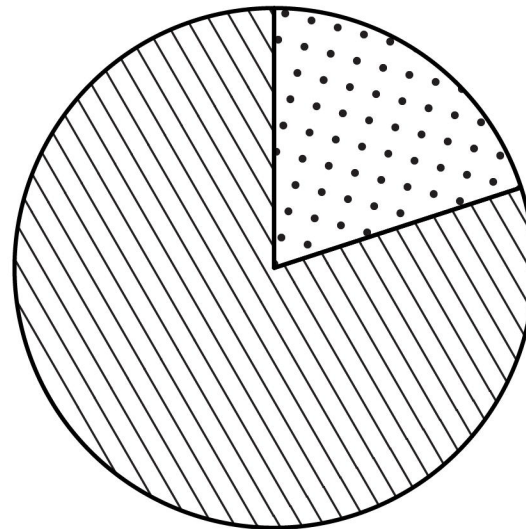

(C)

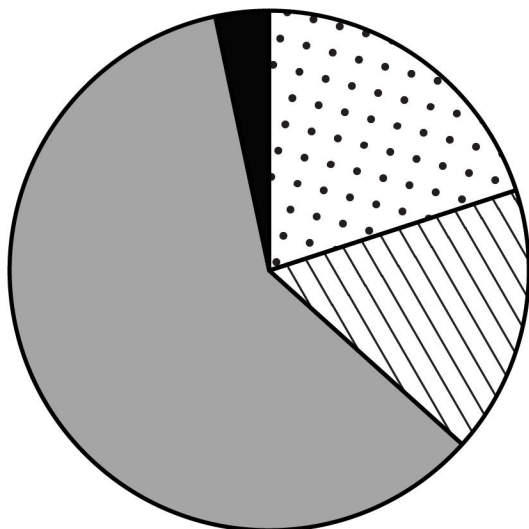

(D)

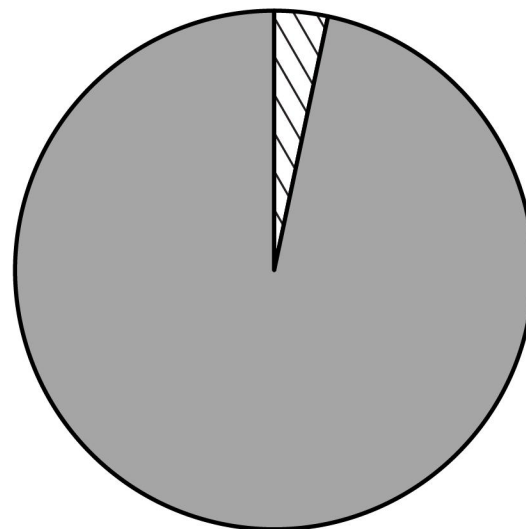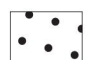

Gazing

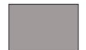

Scared

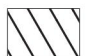

Gazing with tail wagging

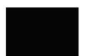

No reaction

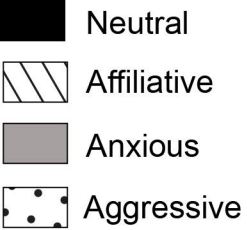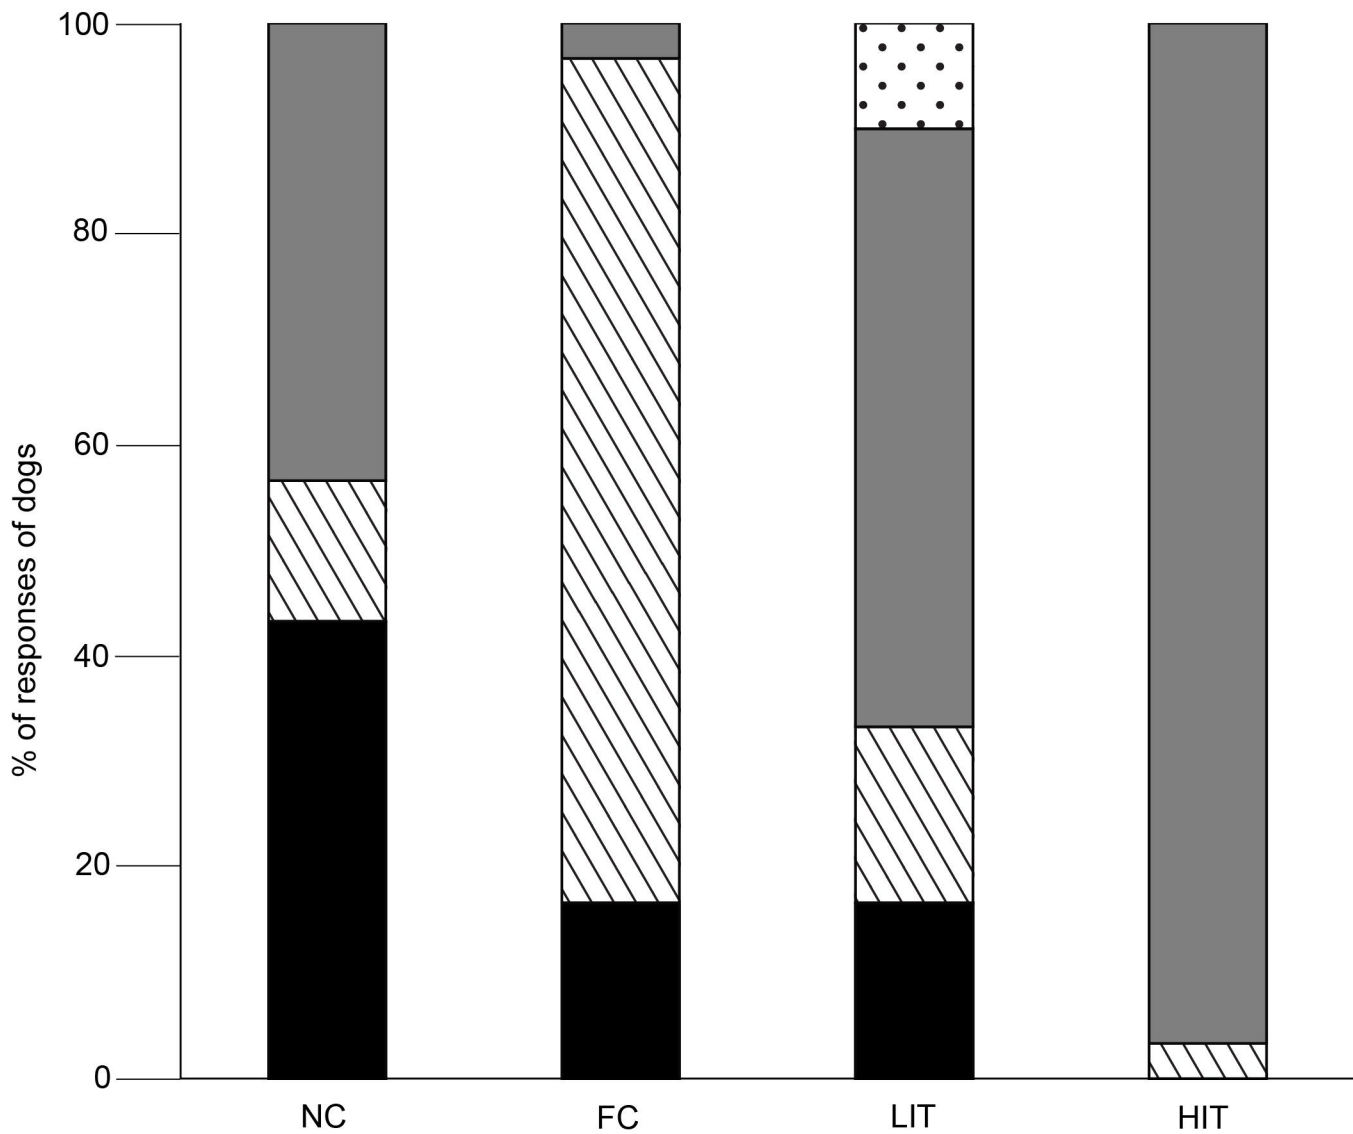

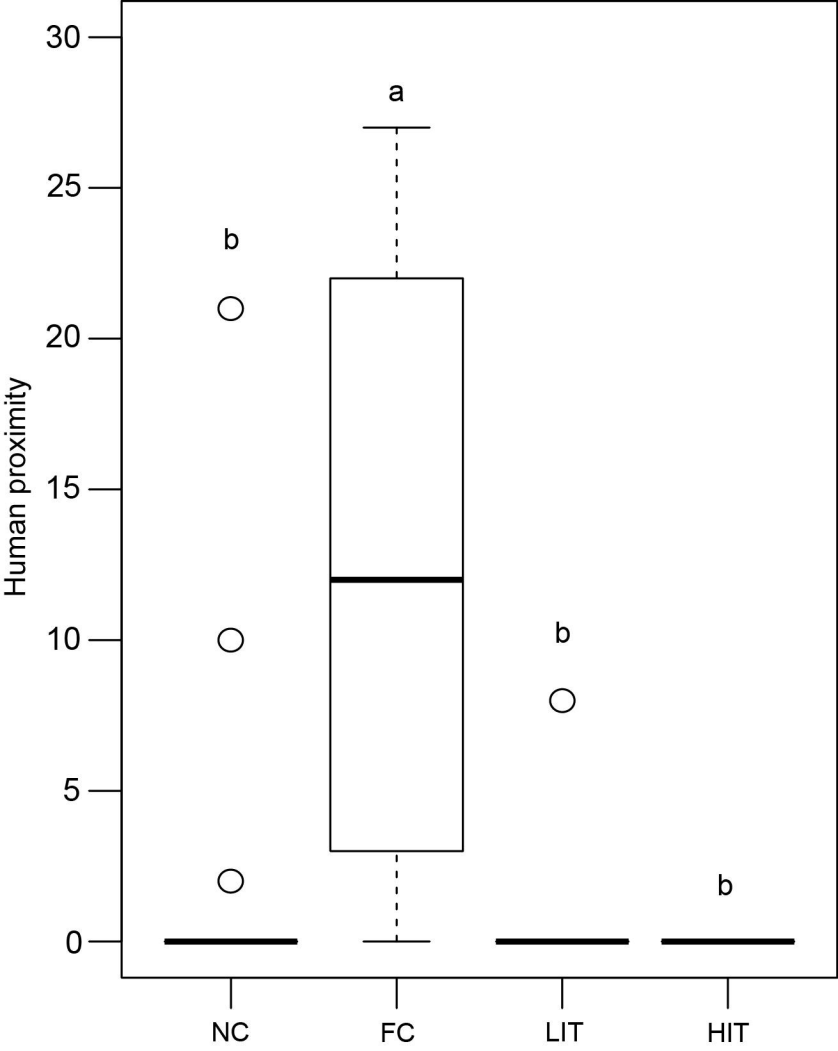

Source: http://biorxiv.org/content/10.1101/374595v1.full.pdf
